# Supplementary material for: Novel Zn/ZnI2-promoted cross-coupling of acrylic acid esters with arylaldehydes to α-aroyladipic acid esters
Source: Royal Society of Chemistry journal article supplement (doi:10.1039/b208608e), 2002-01-01
Supplement: b208608e.doc [file b208608e.doc]

**Supporting information**

Novel Zn/ZnI2-Promoted Cross-Coupling of Acrylic Acid Esters with Arylaldehydes to -Aroyladipic Acid Esters

Hidehiro Sakurai, Hiroki Takeuchi, and Toshikazu Hirao

Department of Applied Chemistry, Faculty of Engineering,

Osaka University, Yamada-oka, Suita, Osaka 565-0871 Japan

**A typical procedure:** A 30 mL two-necked round-bottomed flask was charged with 260 mg (4 mmol) of zinc powder, flame-dried, and then purged with argon. A DMF (4 mL) solution of ZnI2 (319 mg, 1 mmol) and methyl acrylate (90 L, 1 mmol) was added via syringe. After the mixture was heated at 70 °C, benzaldehyde (212 mg, 2 mmol) was added to the miexture, which was stirred at 70 °C for 24 h. After cool down to room temperature, the mixture was diluted with ether (10 mL) and then 1.5 M HCl solution(10 mL) was added. After stirring for 10 min, the mixture was filtrated through Celite and the aqueous phase was extracted with ether (20 mL x 3). The combined organic phase was washed with H2O then brine, dried over MgSO4, and evaporated in vacuo. Purification by silica-gel colomn chromatography gave the pure product **1a** as a colorless oil (139 mg, 50% yield).

**Dimethyl 2-benzoyladipate (1a)**

1H-NMR (400 MHz, CDCl3) ** = 1.92-2.13 (2H, m), 2.46 (2H, t, *J* = 7.0 Hz), 3.04-3.17 (2H, m), 3.50-3.56 (1H, m), 3.71 (3H, s), 3.74 (3H, s), 7.44 (2H, t, *J* = 8.5 Hz), 7.52 (1H, t, *J* = 8.5 Hz), 7.94 (2H, d, *J* = 8.5 Hz). 13C-NMR (100 MHz, CDCl3) 27.1(CH2), 31.8(CH2), 39.7(CH), 40.5(CH2), 51.8(-OCH3), 52.0(-OCH3), 128.0(CH), 128.5(CH), 133.2(CH), 136.4(C), 173.0(C=O, ester), 175.0(C=O, ester), 197.4(C=O, ketone) ppm. IR (neat) 2920, 1735, 1685, 1444, 1371, 1218, 1169 cm-1. Anal. Found: C, 64.68; H, 6.55%. Calcd for C15H18O5: C, 64.74; H, 6.53%.

**Di-*t*-butyl 2-benzoyladipate (1b)**

1H-NMR (300 MHz, CDCl3) ** = 1.44 (18H, s), 1.84-2.13 (2H, m), 2.32 (2H, t, *J* = 7.0 Hz), 2.91-3.01 (2H, m), 3.33-3.46 (1H, m), 7.35 (2H, t, *J* = 8.5 Hz), 7.56 (1H, t, *J* = 8.5 Hz), 7.95 (2H, d, *J* = 8.5 Hz). 13C-NMR (75 MHz, CDCl3) 27.5(CH2), 28.1(CH3), 28.2(CH3), 33.2(CH2), 40.5(CH), 40.7(CH2), 80.4(-OC), 80.7(-OC), 127.9(CH), 128.4(CH), 132.7(CH), 136.6(C), 172.0(C=O, ester), 173.9(C=O, ester), 197.7(C=O, ketone) ppm. IR (neat) 2977, 1726, 1692, 1452, 1369, 1223, 1154 cm-1. Anal. Found: C, 69.32; H, 8.29%. Calcd for C21H30O5: C, 69.59; H, 8.34%.

**Di-*t*-butyl 2-(4-methylbenzoyl)adipate (1c)**

1H-NMR (300 MHz, CDCl3) ** = 1.44 (18H, s), 1.85-1.95 (2H, m), 2.32 (2H, t, *J* = 7.7 Hz), 2.47 (3H, s), 2.85-3.02 (2H, m), 3.26-3.40 (1H, m), 7.35 (2H, d, *J* = 7.5 Hz), 7.65 (2H, d, *J* = 7.5 Hz). 13C-NMR (75 MHz, CDCl3) 21.2(CH3), 27.4(CH2), 28.1(CH3), 33.1(CH2), 40.9(CH), 43.4(CH2), 80.4(-OC), 80.7(-OC), 128.3(CH), 131.2(CH), 137.6(C), 137.9(C), 172.1(C=O, ester), 174.0(C=O, ester), 201.8(C=O, ketone) ppm. IR (neat) 2976, 1728, 1690, 1368, 1256, 1153 cm-1. Anal. Found: C, 69.91; H, 8.44%. Calcd for C22H32O5: C, 70.18; H, 8.57%.

**Di-*t*-butyl 2-(4-chlorobenzoyl)adipate (1d)**

1H-NMR (300 MHz, CDCl3) ** = 1.44 (18H, s), 1.86-1.92 (2H, m), 2.31 (2H, t, *J* = 7.0 Hz), 2.89-3.00 (2H, m), 3.33-3.41 (1H, m), 7.41 (2H, d, *J* = 8.5 Hz), 7.88 (2H, d, *J* = 8.5 Hz). 13C-NMR (75MHz, CDCl3) 27.4(CH2), 28.1(CH3), 33.1(CH2), 40.5(CH), 40.6(CH2), 80.4(-OC), 80.8(-OC), 128.8(CH), 129.3(CH), 134.9(C), 139.4(C), 172.0(C=O, ester), 173.8(C=O, ester), 196.5(C=O, ketone) ppm. IR (neat) 2977, 1728, 1691, 1368, 1255, 1153 cm-1. Anal. Found: C, 63.43; H, 7.35; Cl, 8.91%. Calcd for C21H29ClO5: C, 63.55; H, 7.36; Cl, 8.93%.
